# Supplementary material for: Synthesis and Cytotoxic Activity of the Derivatives of N-(Purin-6-yl)aminopolymethylene Carboxylic Acids and Related Compounds
Source: MDPI journal article supplement (doi:10.3390/molecules28041853), 2023-02-15
Supplement: s1 [file s1]

# Supplementary Materials

## Synthesis and Cytotoxic Activity of *N*-(Purin-6-yl)aminopolymethylene Carboxylic Acids and Related Compounds

Victor P. Krasnov <sup>1,\*</sup>, Olga A. Vozdvizhenskaya <sup>1</sup>, Maria A. Baryshnikova <sup>2</sup>, Alexandra G. Pershina <sup>3,4</sup>,  
Vera V. Musiyak <sup>1</sup>, Tatyana V. Matveeva <sup>1</sup>, Kseniya V. Nevskaya <sup>3</sup>, Olga Ya. Brikunova <sup>3</sup>,  
Dmitry A. Gruzdev <sup>1</sup> and Galina L. Levit <sup>1</sup>

- <sup>1</sup> Postovsky Institute of Organic Synthesis, Russian Academy of Sciences (Ural Branch), Ekaterinburg 620108, Russia  
<sup>2</sup> Blokhin National Medical Research Center of Oncology, Ministry of Health of the Russian Federation, Moscow 115522, Russia  
<sup>3</sup> Center of Bioscience and Bioengineering, Siberian State Medical University, Tomsk 634050, Russia  
<sup>4</sup> Research School of Chemical and Biomedical Engineering, National Research Tomsk Polytechnic University, Tomsk 634050, Russia

### Table of Contents

|                               |     |
|-------------------------------|-----|
| NMR Spectra .....             | S2  |
| HPLC Data .....               | S11 |
| Cytotoxicity Assessment ..... | S12 |
| Cell Cycle Analysis .....     | S15 |

## NMR Spectra

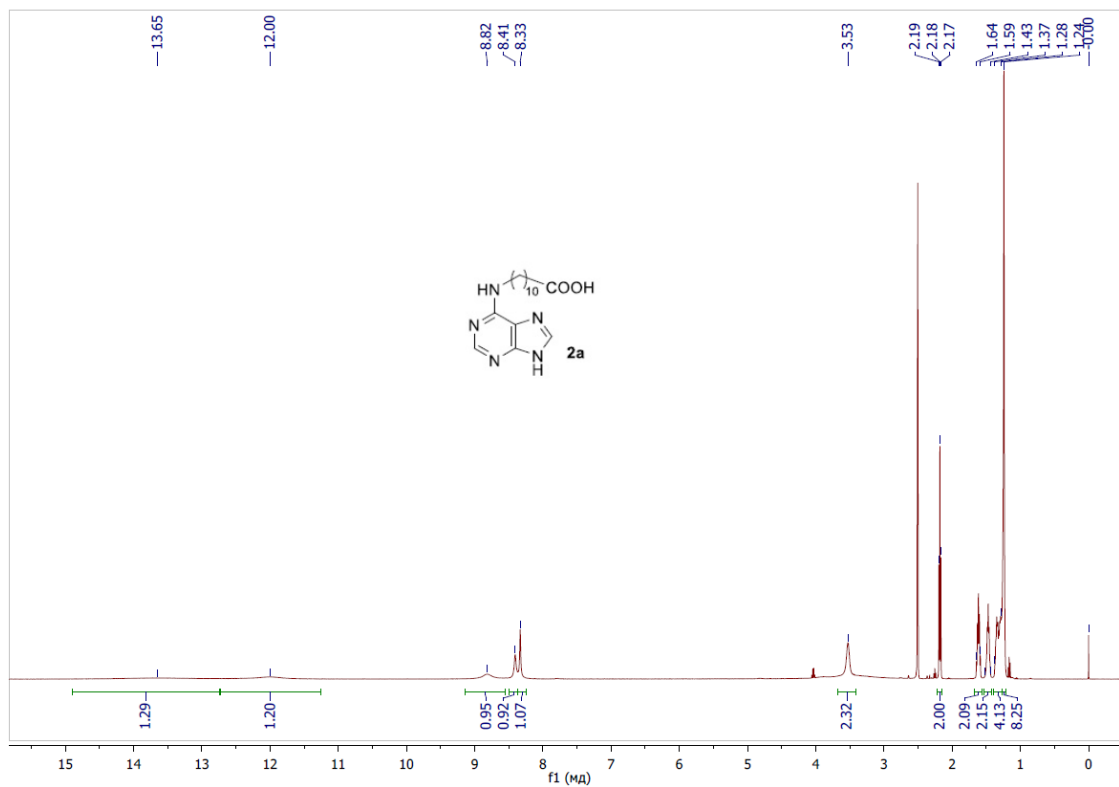

**Figure S1.** <sup>1</sup>H NMR spectrum of compound **2a** (DMSO-*d*<sub>6</sub>, 500 MHz)

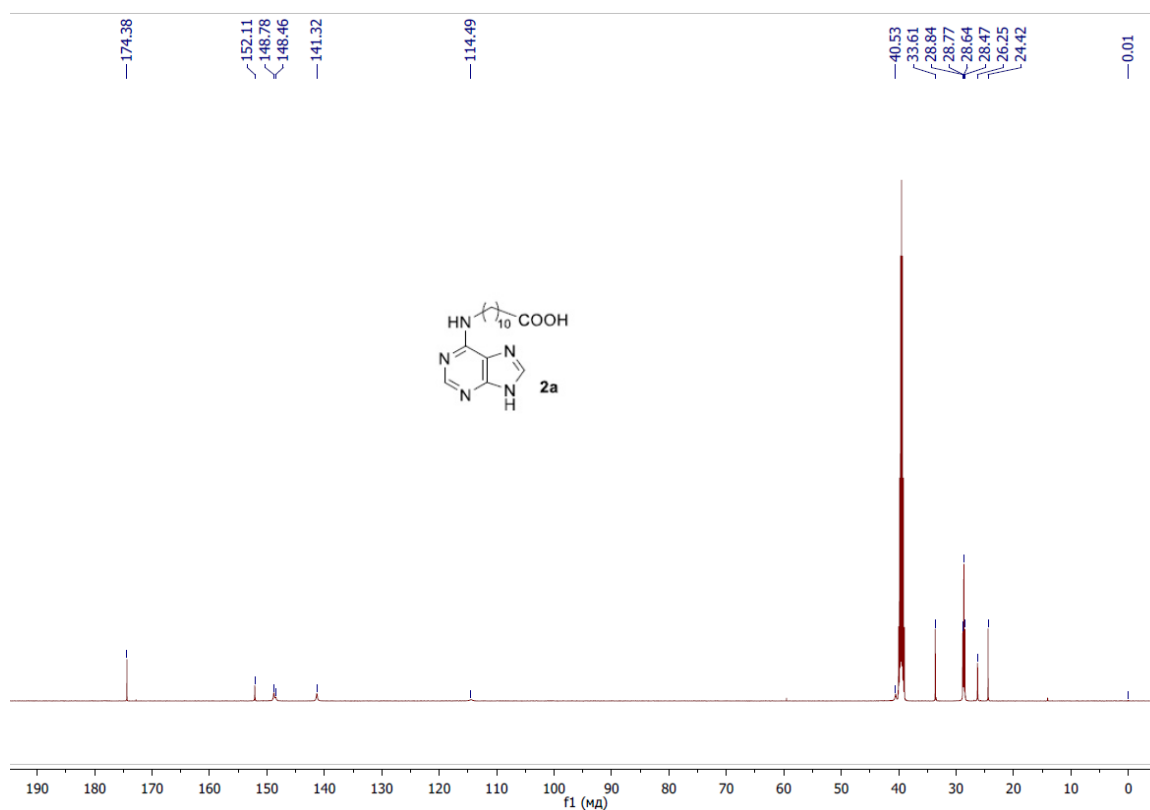

**Figure S2.** <sup>13</sup>C NMR spectrum of compound **2a** (DMSO-*d*<sub>6</sub>, 125 MHz)

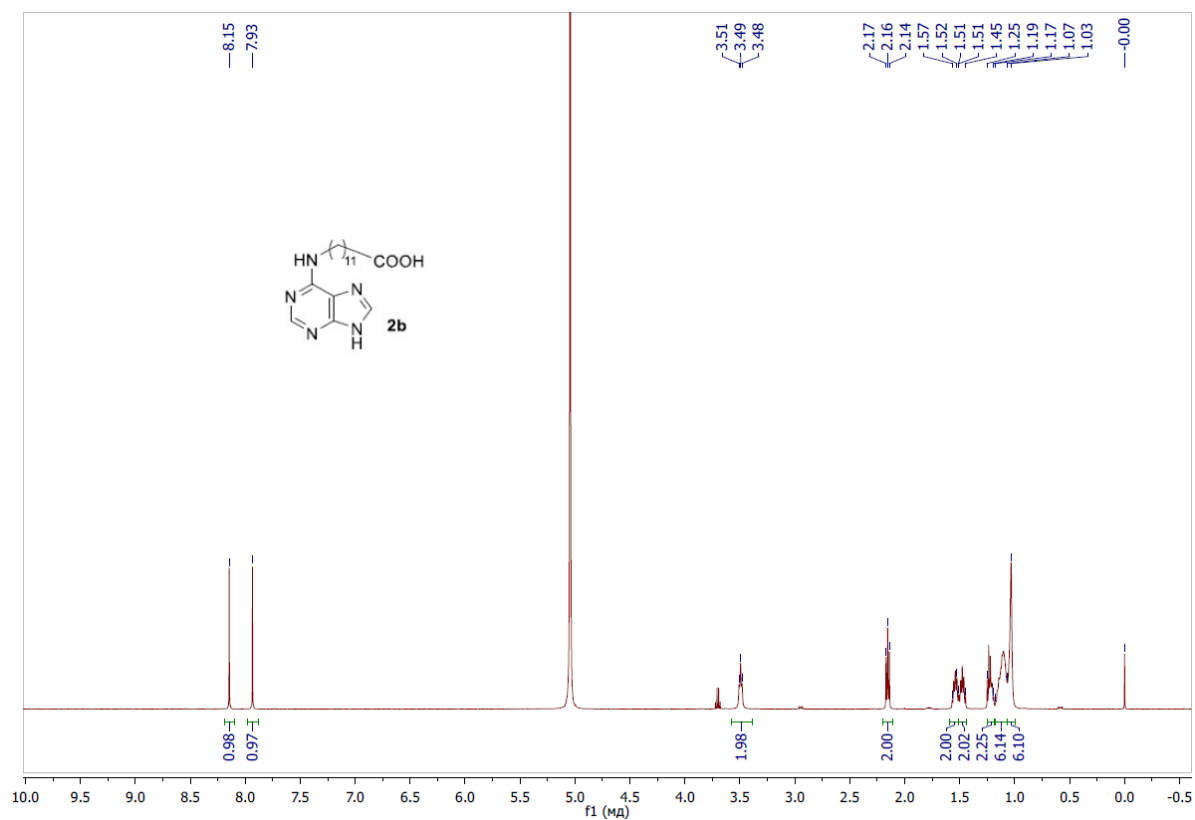

**Figure S3.** <sup>1</sup>H NMR spectrum of compound **2b** (D<sub>2</sub>O + NaOD, 500 MHz)

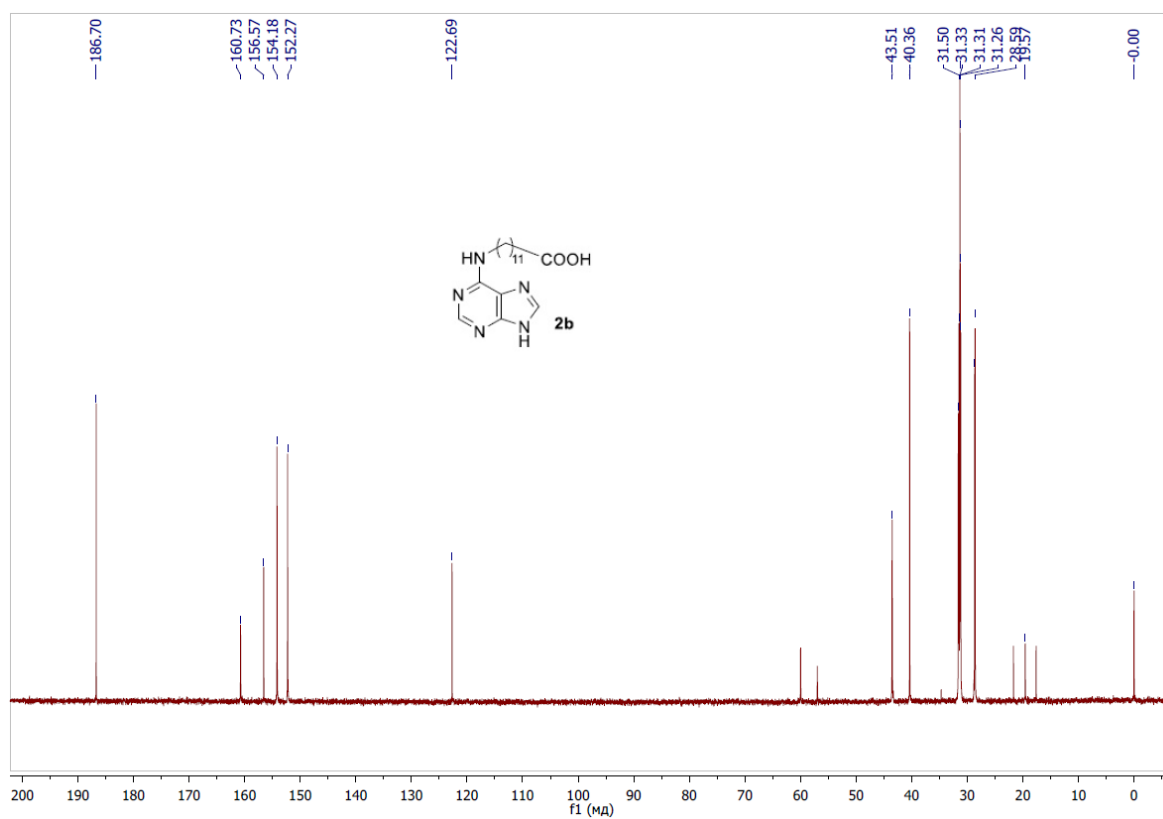

**Figure S4.** <sup>13</sup>C NMR spectrum of compound **2b** (D<sub>2</sub>O + NaOD, 125 MHz)

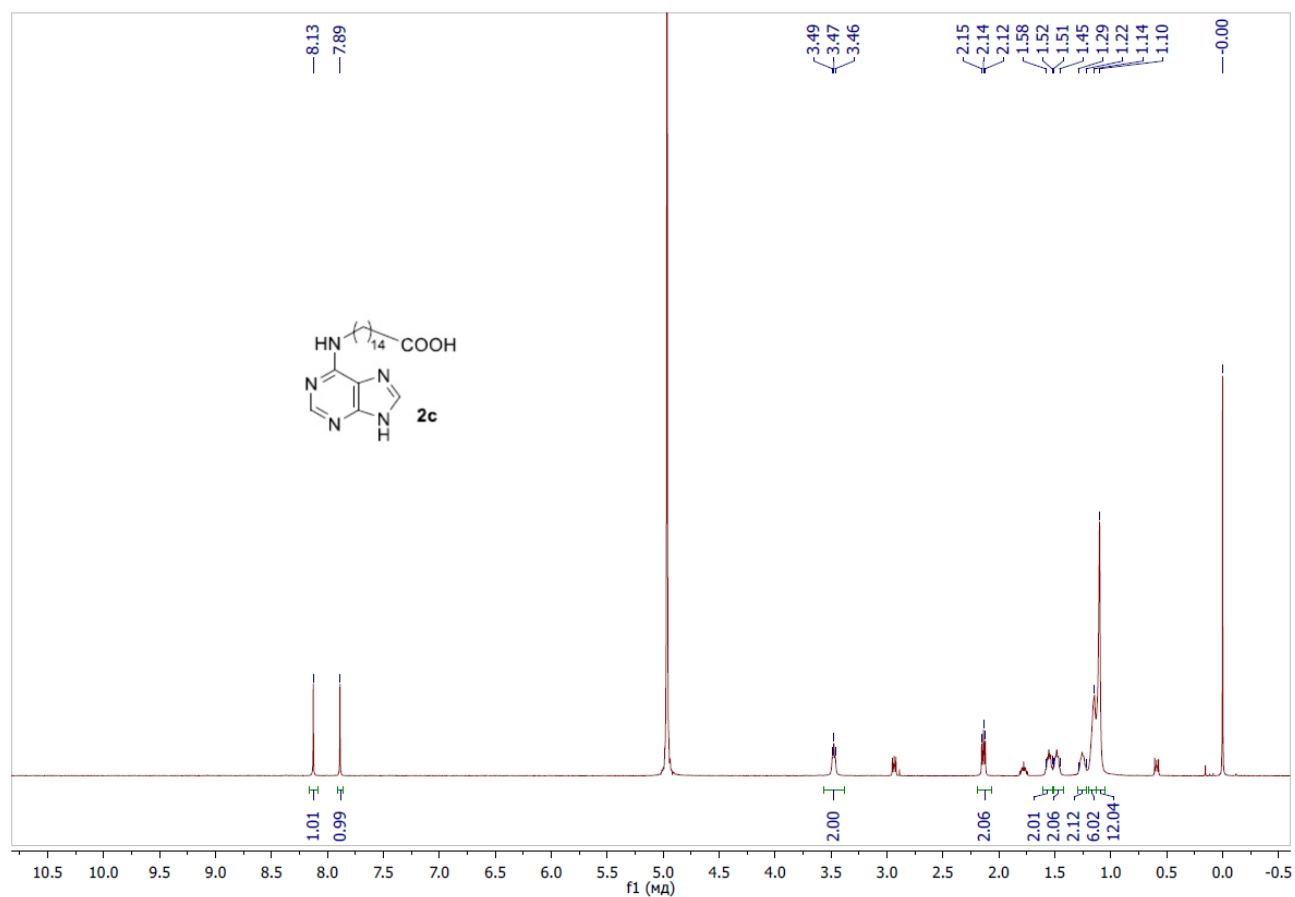

**Figure S5.** <sup>1</sup>H NMR spectrum of compound **2c** (D<sub>2</sub>O + NaOD, 500 MHz)

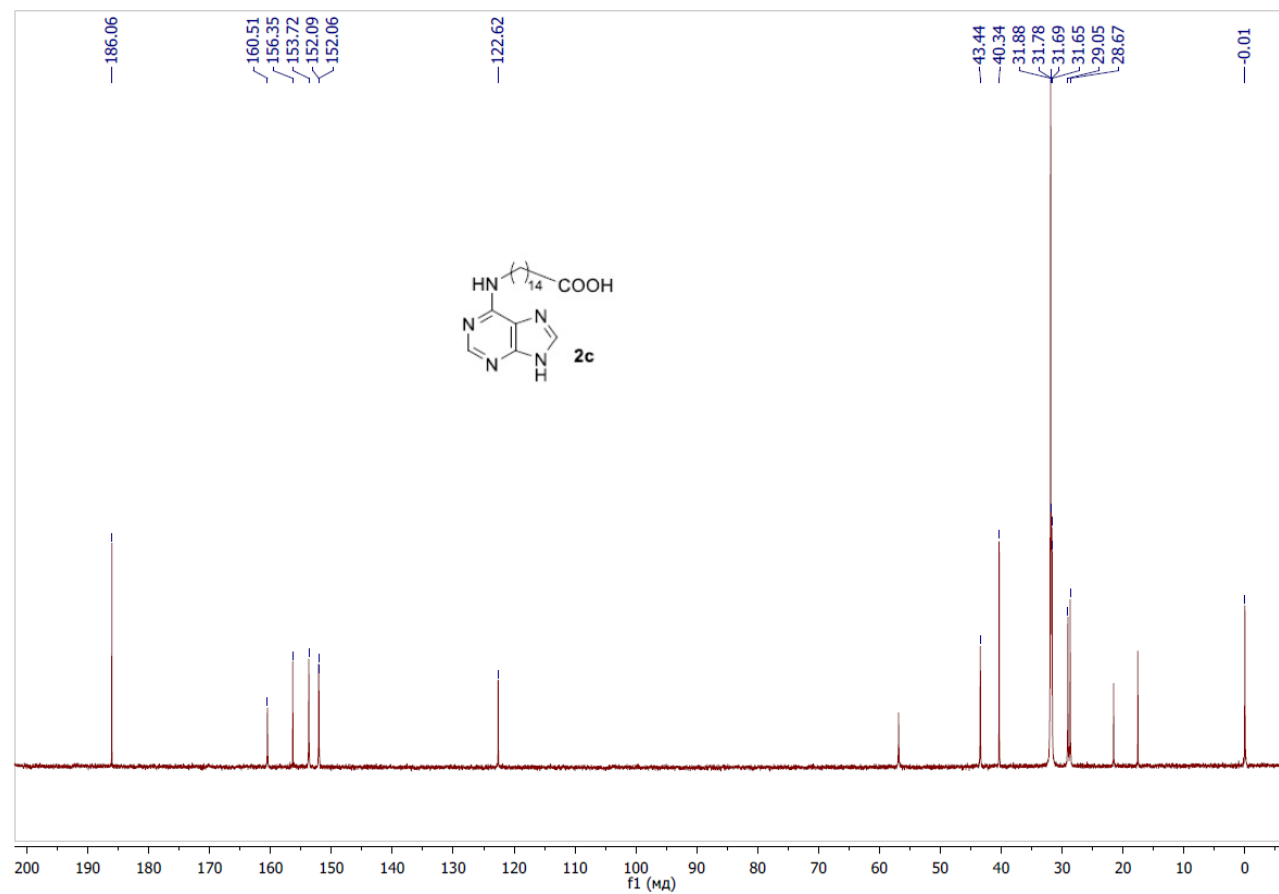

**Figure S6.** <sup>13</sup>C NMR spectrum of compound **2c** (D<sub>2</sub>O + NaOD, 125 MHz)

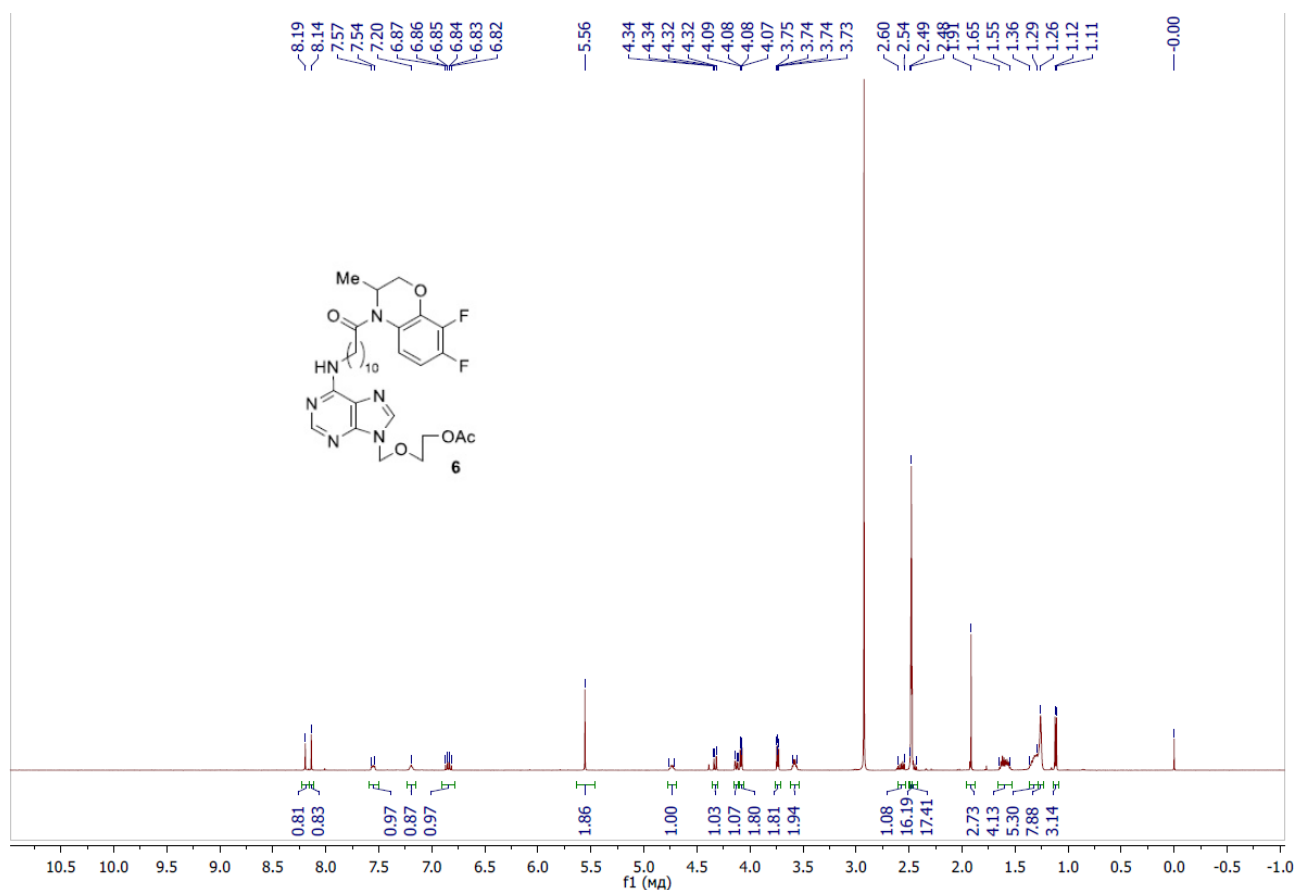

**Figure S7.** <sup>1</sup>H NMR spectrum of compound 6 (DMSO-*d*<sub>6</sub>, 100 °C, 500 MHz)

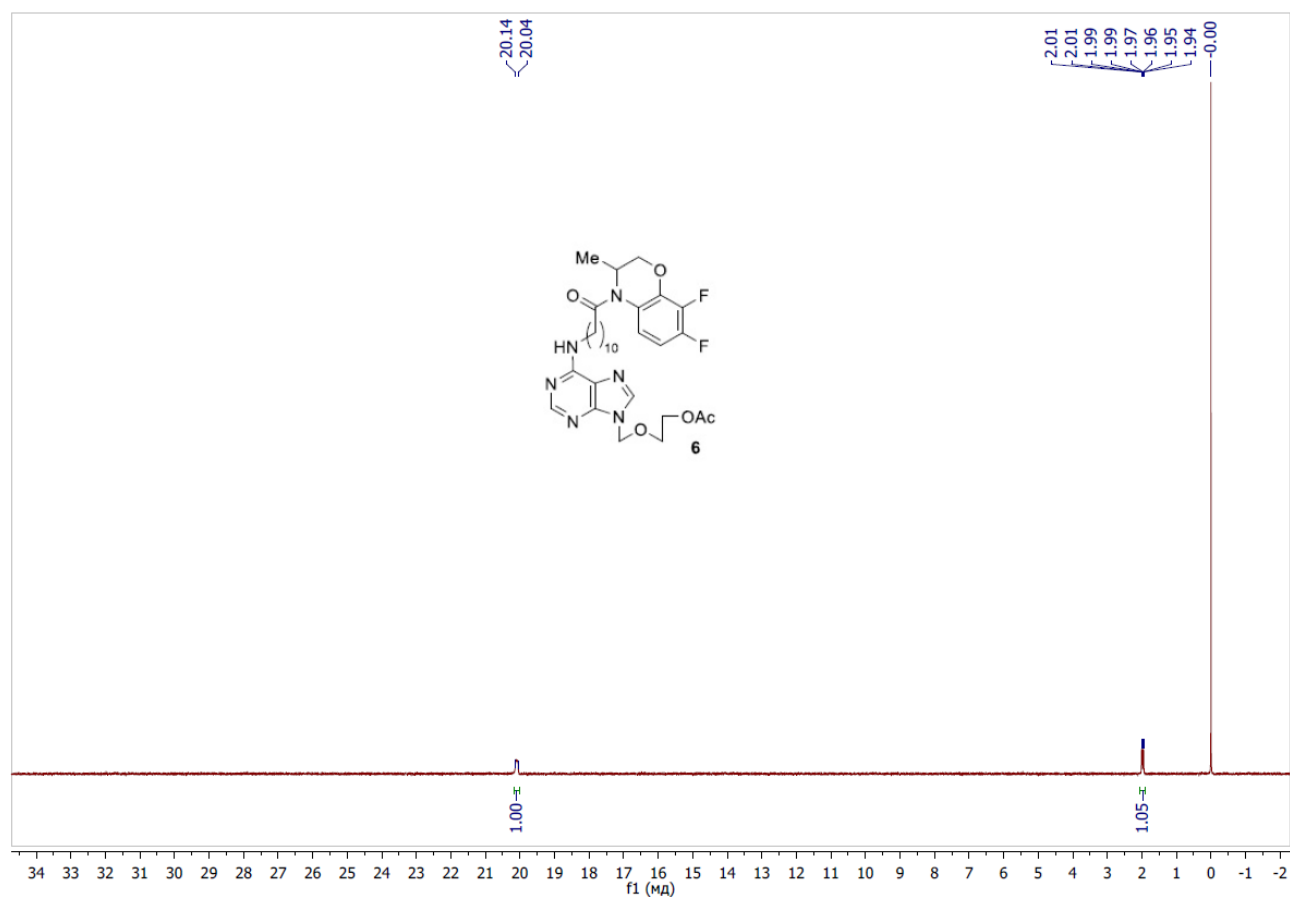

**Figure S8.** <sup>19</sup>F NMR spectrum of compound 6 (DMSO-*d*<sub>6</sub>, 100 °C, 470 MHz)

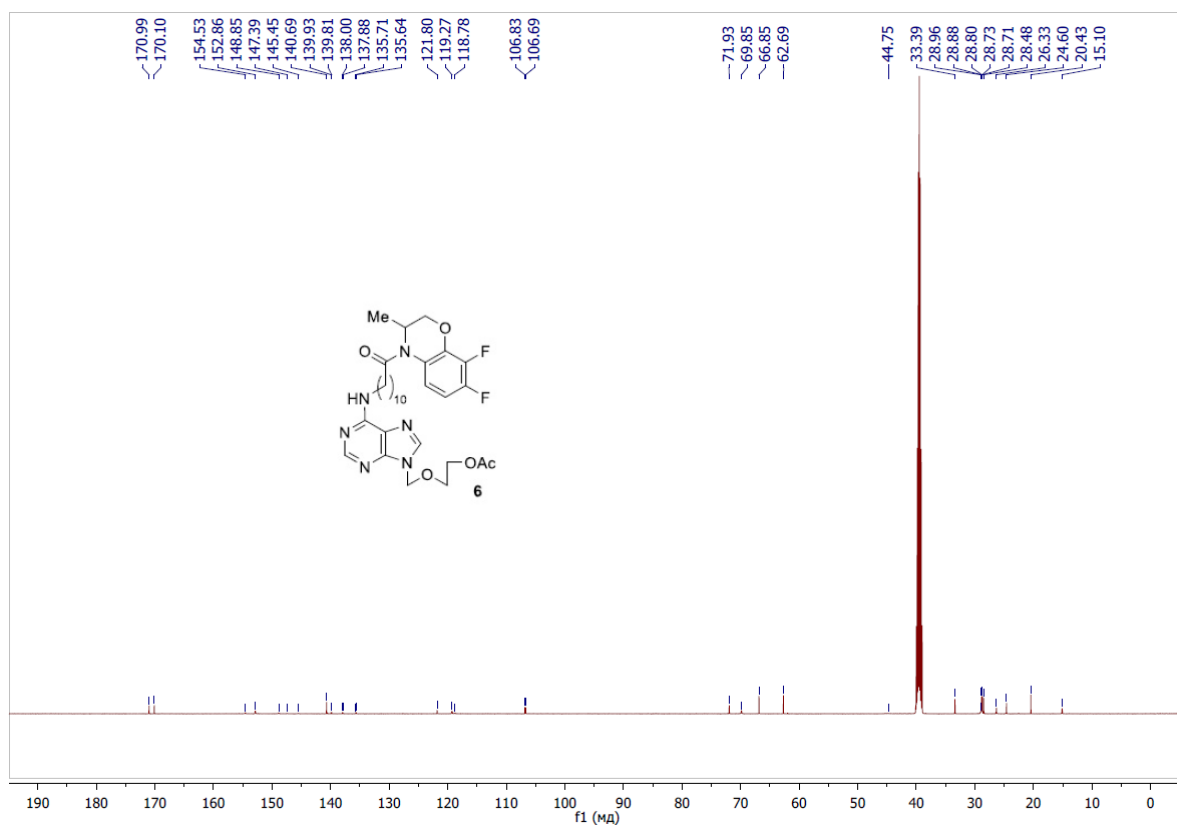

**Figure S9.** <sup>13</sup>C NMR spectrum of compound 6 (DMSO-*d*<sub>6</sub>, 125 MHz)

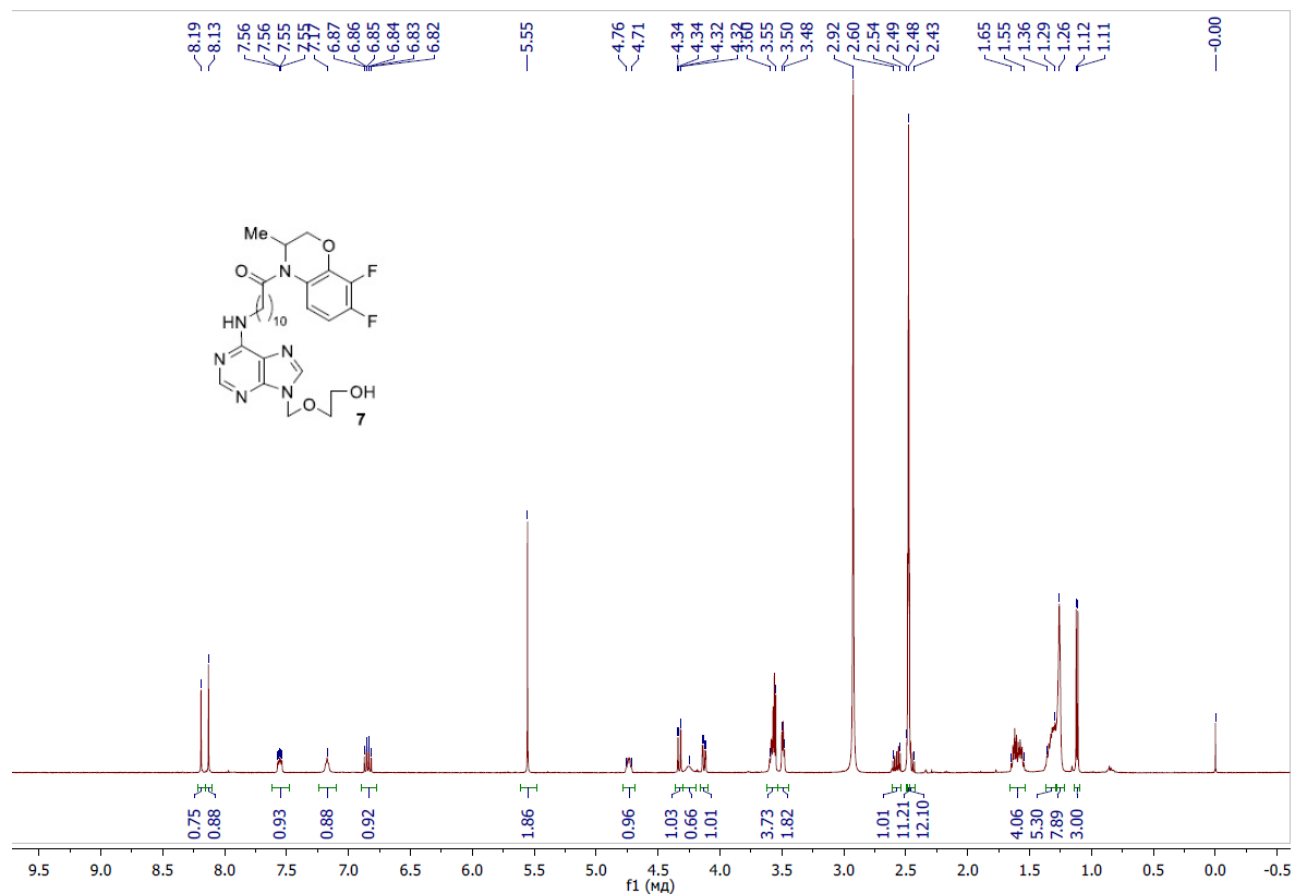

**Figure S10.** <sup>1</sup>H NMR spectrum of compound 7 (DMSO-*d*<sub>6</sub>, 100 °C, 500 MHz)

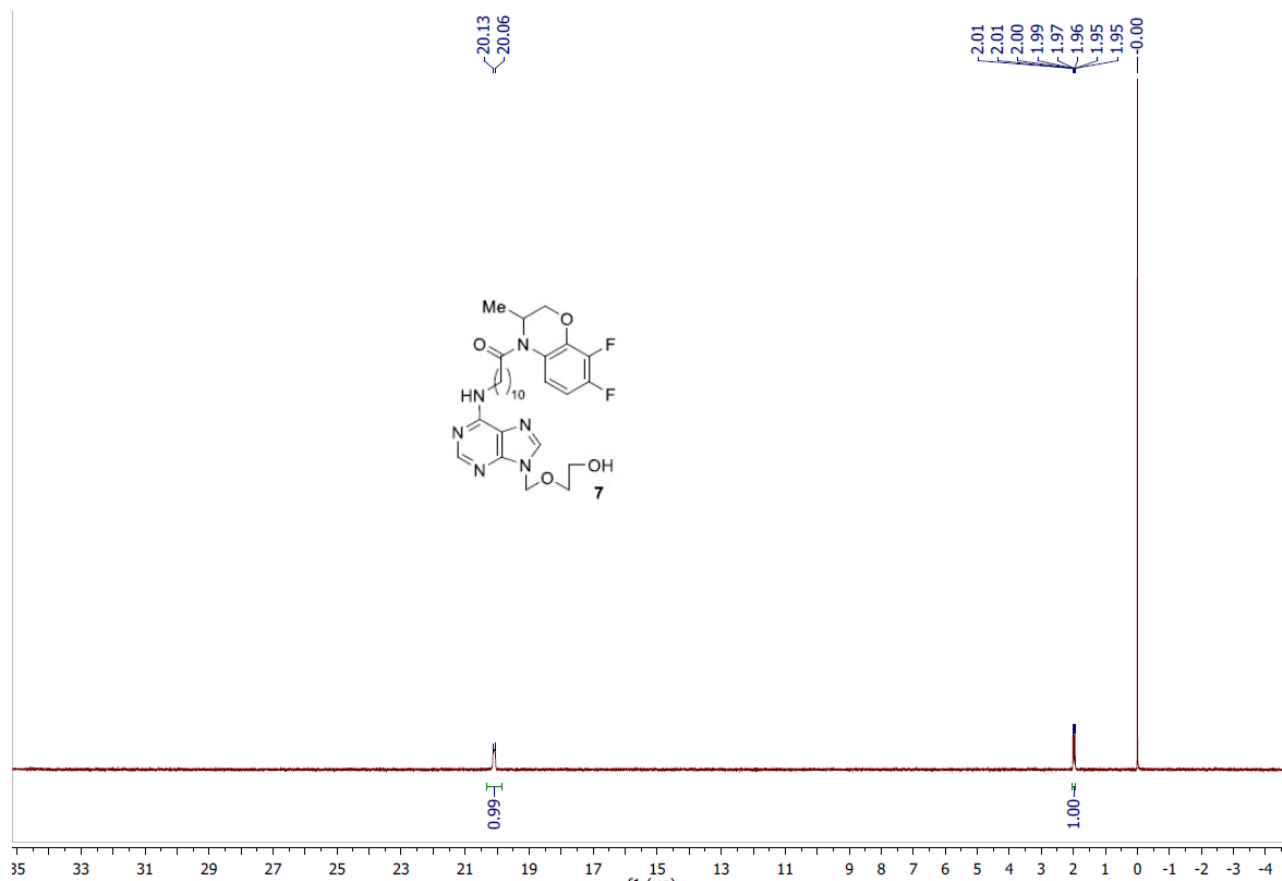

**Figure S11.** <sup>19</sup>F NMR spectrum of compound 7 (DMSO-*d*<sub>6</sub>, 100 °C, 470 MHz)

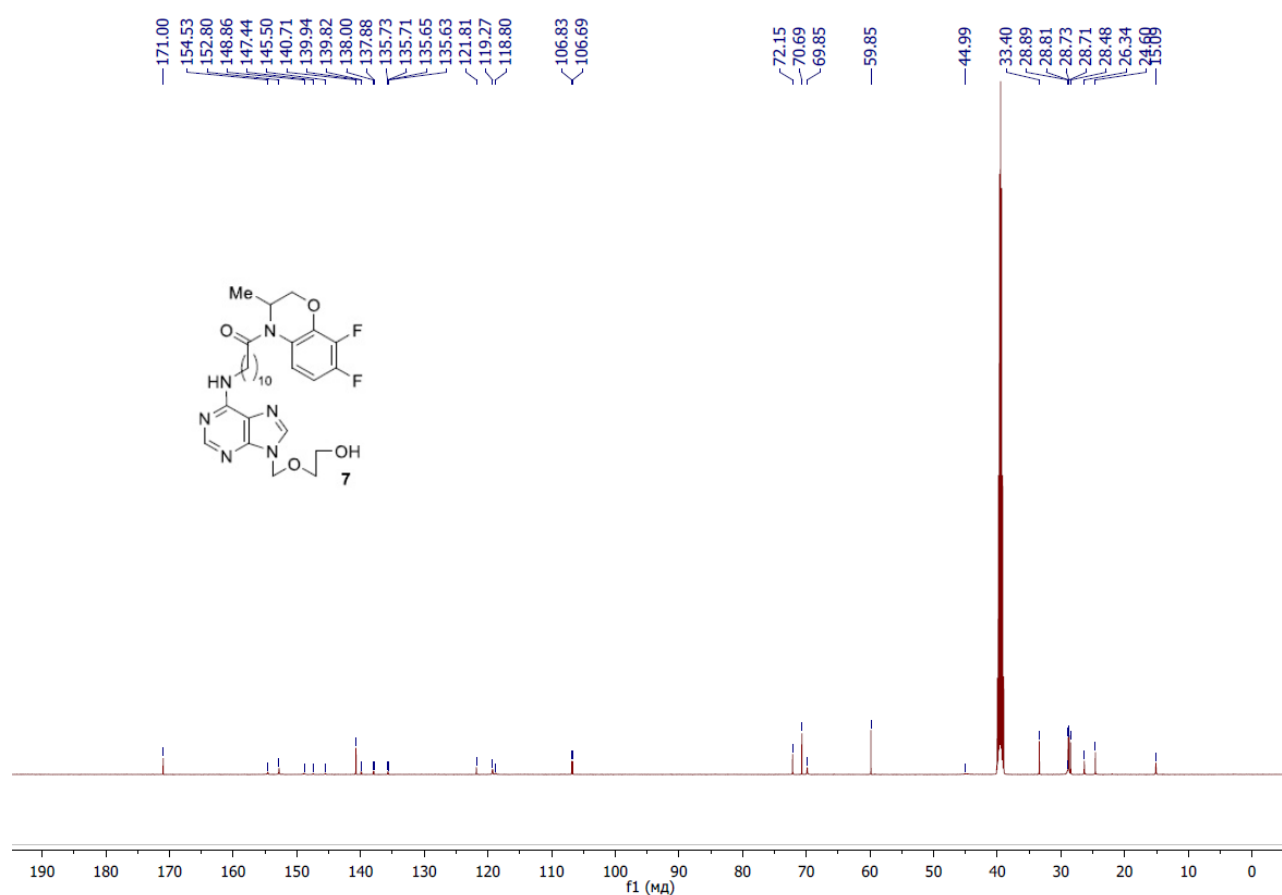

**Figure S12.** <sup>13</sup>C NMR spectrum of compound 7 (DMSO-*d*<sub>6</sub>, 125 MHz)

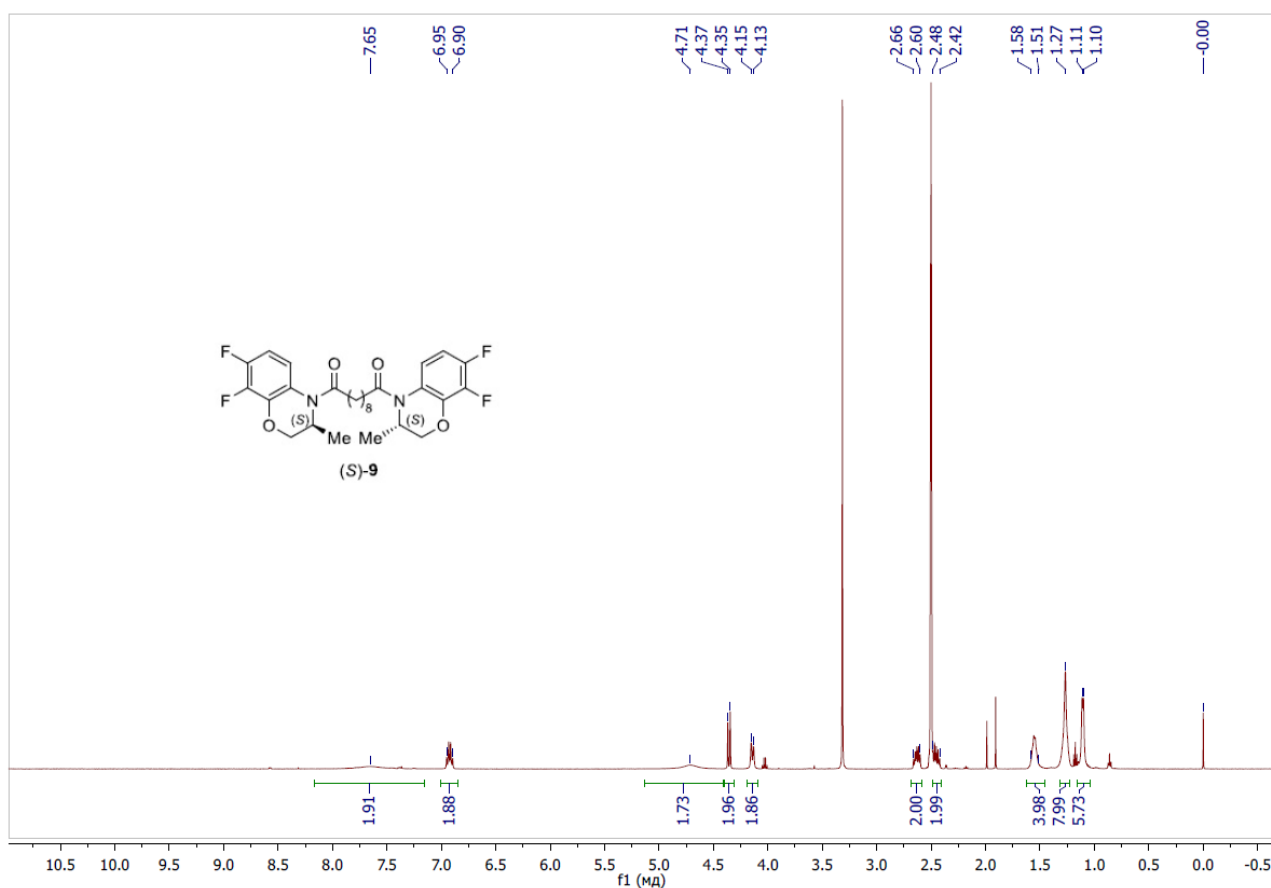

**Figure S13.** <sup>1</sup>H NMR spectrum of compound (S)-9 (DMSO-*d*<sub>6</sub>, 500 MHz)

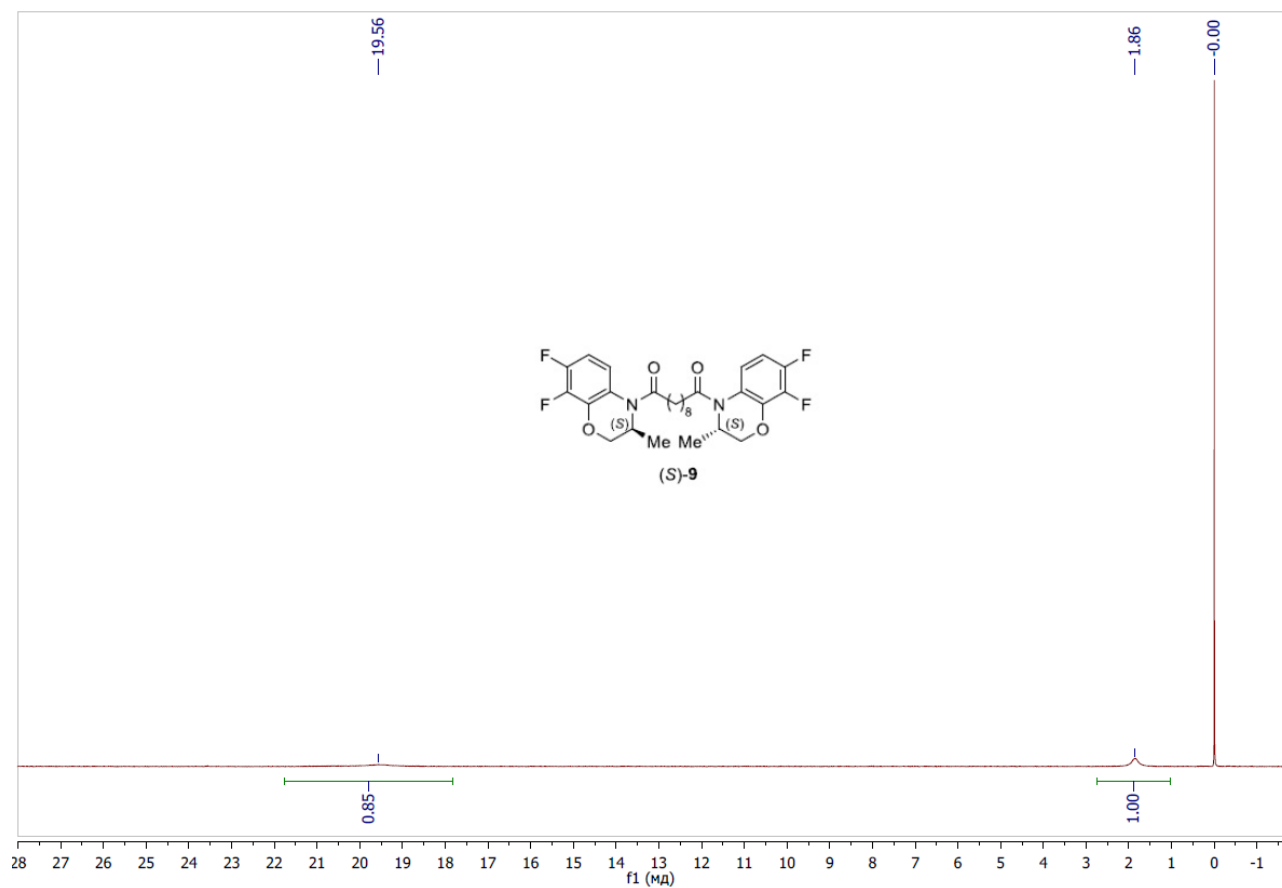

**Figure S14.** <sup>19</sup>F NMR spectrum of compound (S)-9 (DMSO-*d*<sub>6</sub>, 470 MHz)



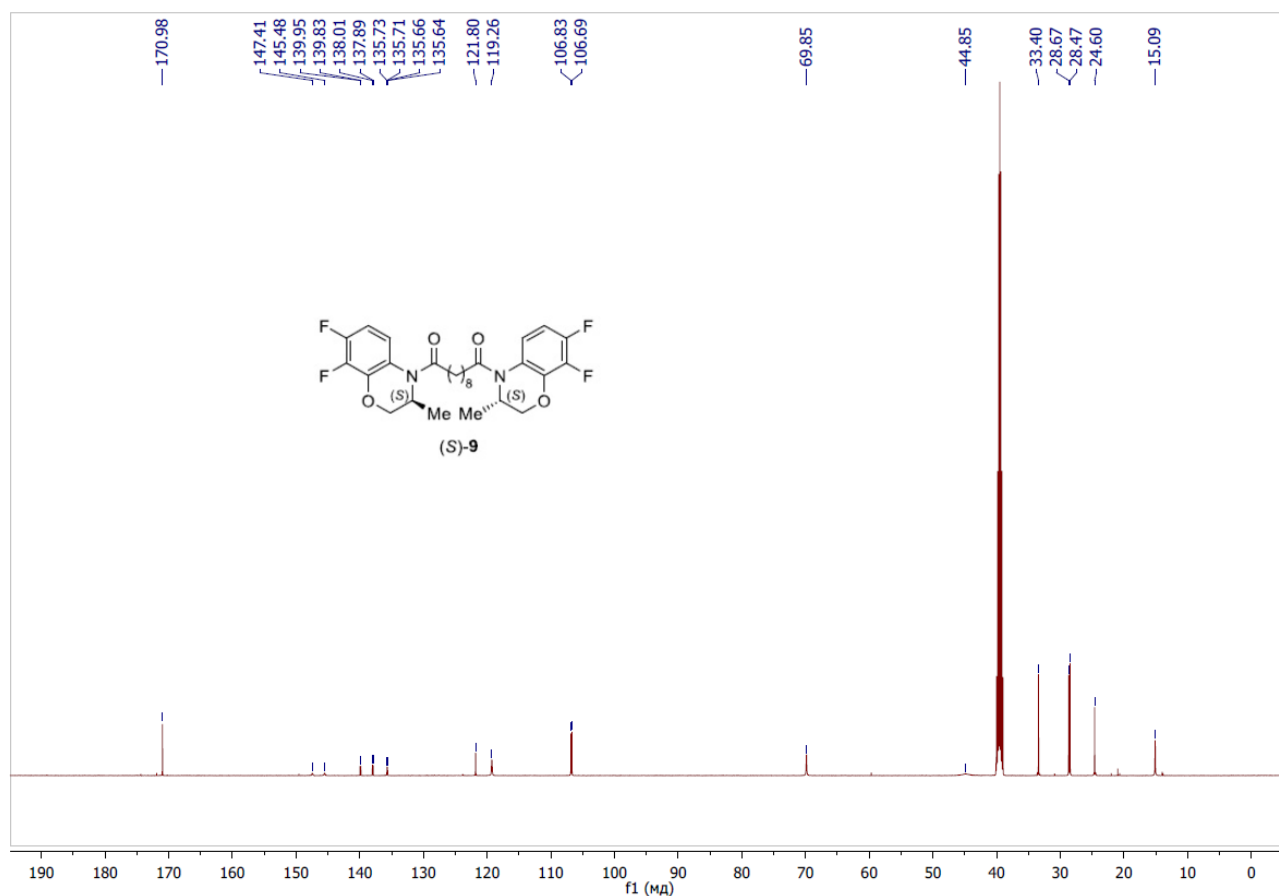

Figure S15. <sup>13</sup>C NMR spectrum of compound (S)-9 (DMSO-*d*<sub>6</sub>, 125 MHz)

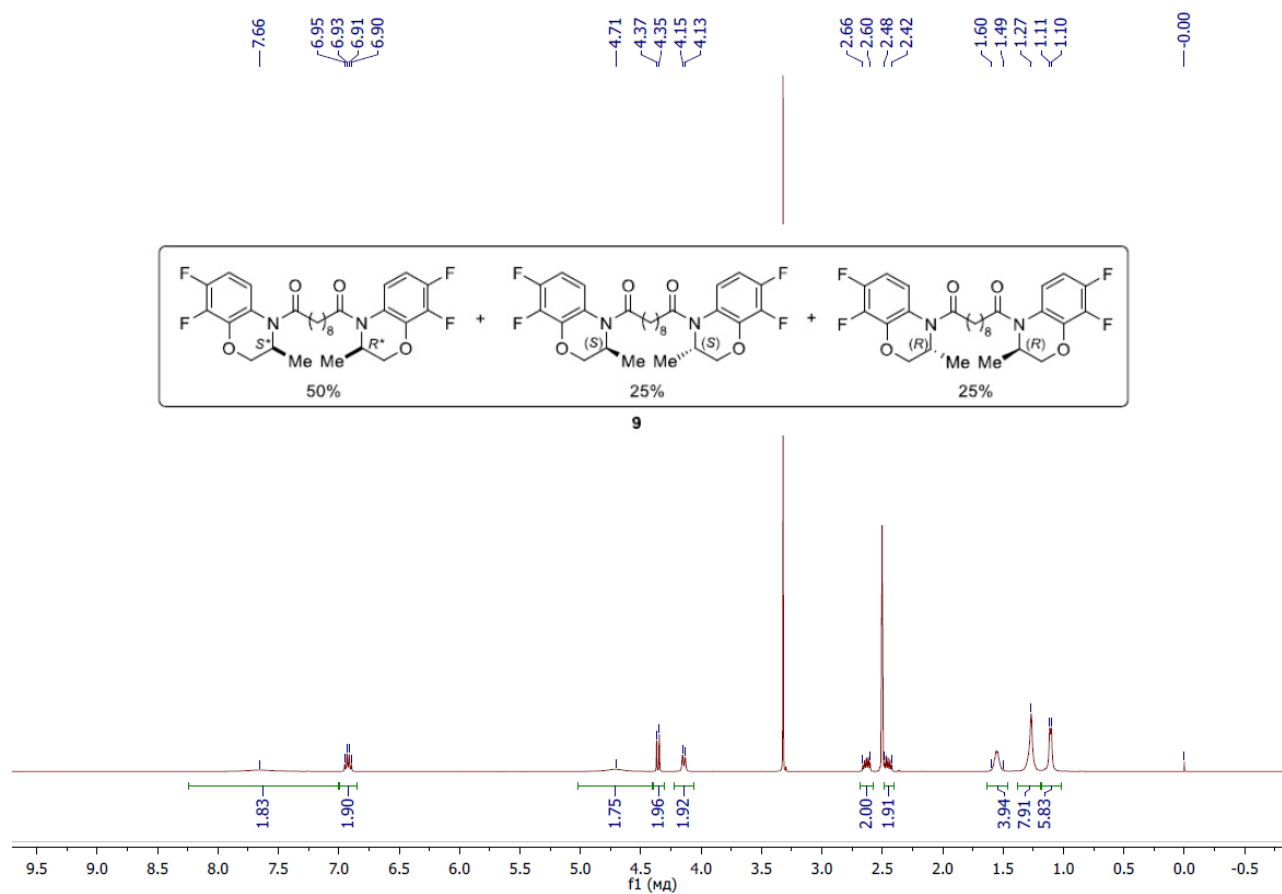

Figure S16. <sup>1</sup>H NMR spectrum of compound 9 (DMSO-*d*<sub>6</sub>, 500 MHz)

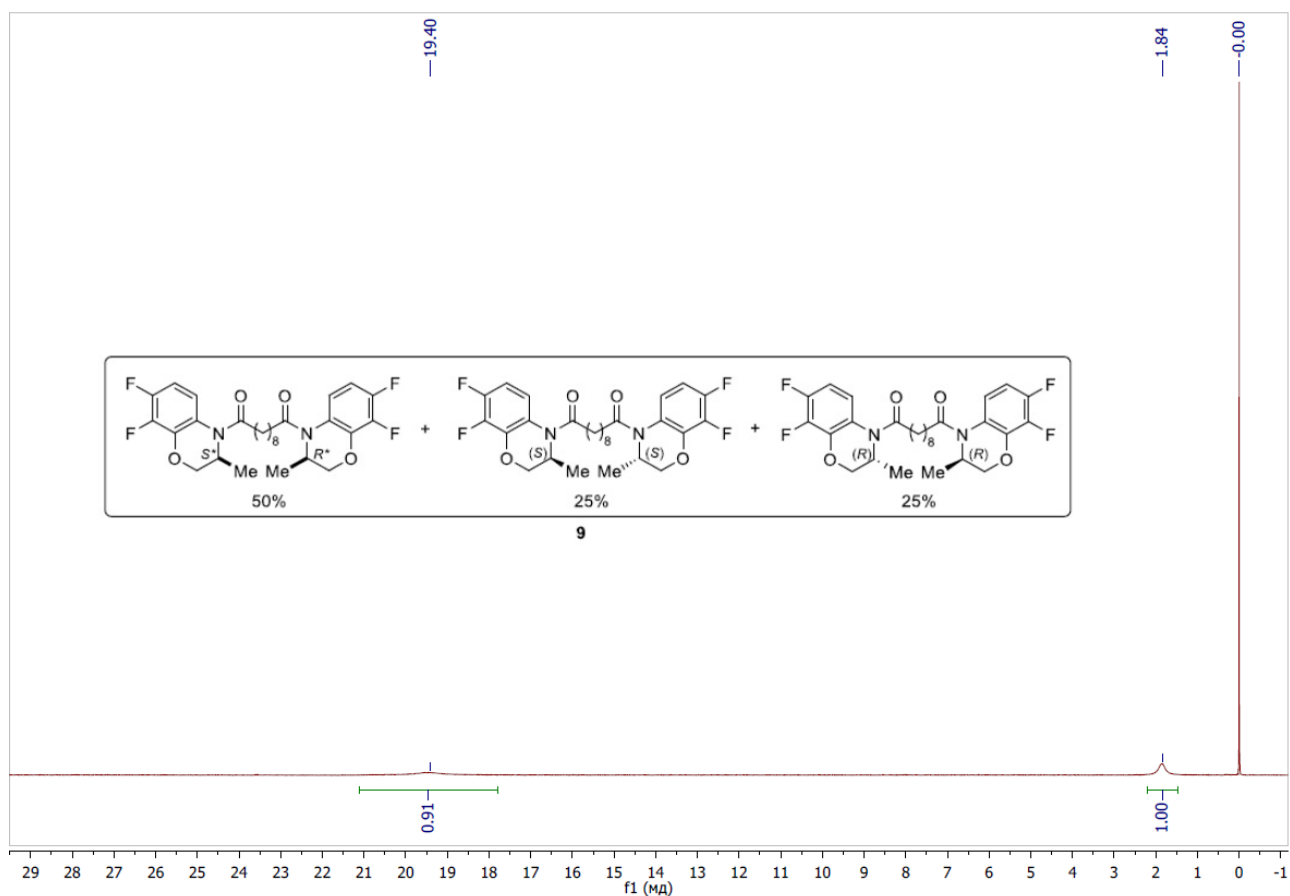

Figure S17. <sup>19</sup>F NMR spectrum of compound 9 (DMSO-*d*<sub>6</sub>, 470 MHz)

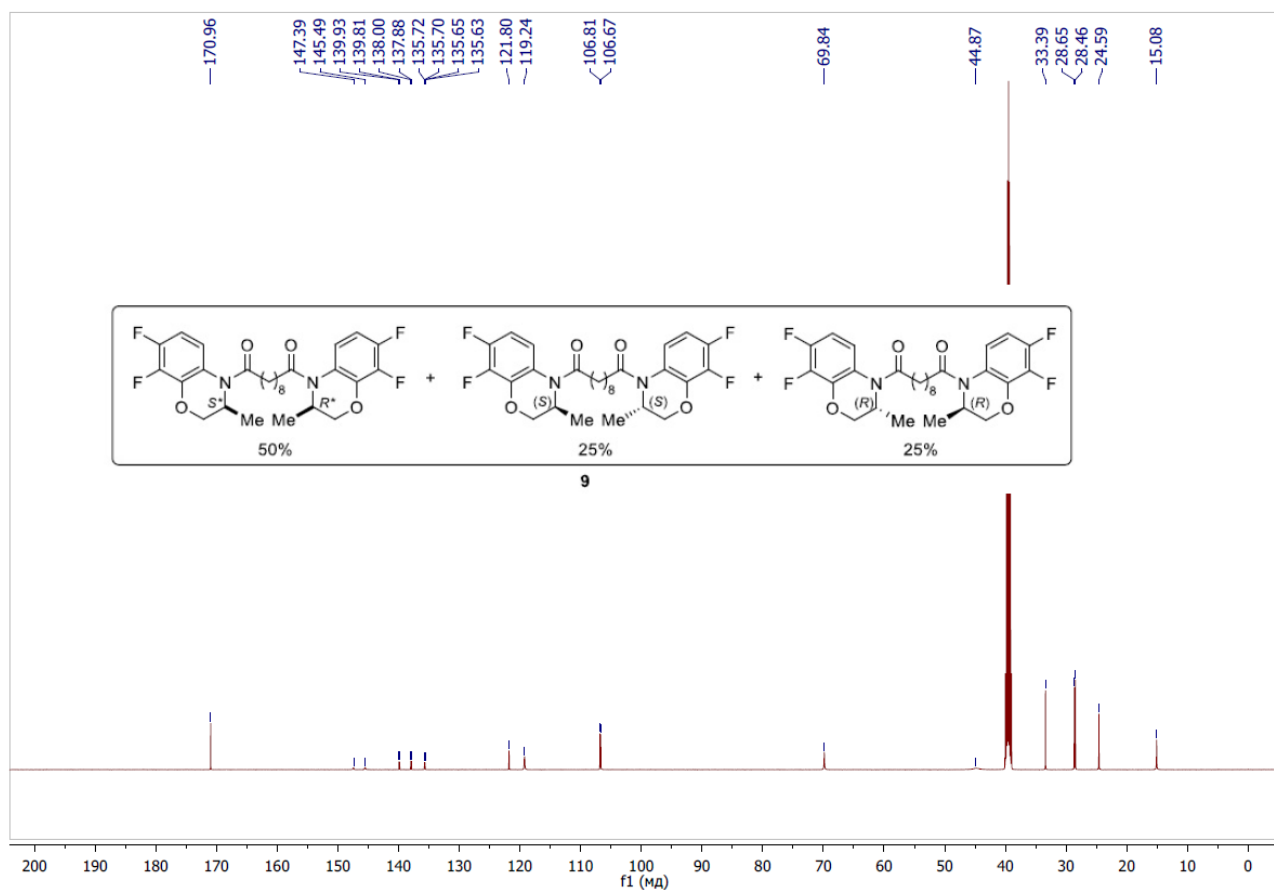

Figure S18. <sup>13</sup>C NMR spectrum of compound 9 (DMSO-*d*<sub>6</sub>, 125 MHz)

## HPLC Data

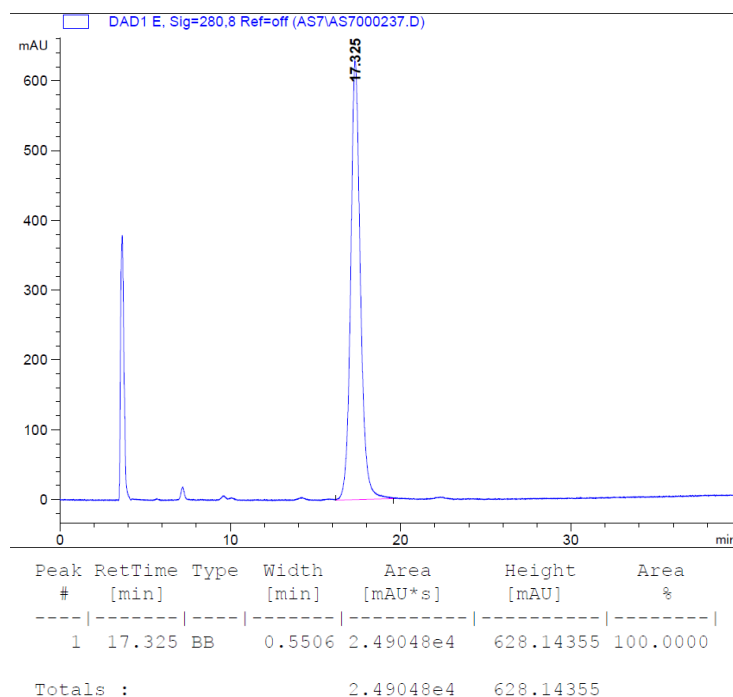

**Figure S19.** HPLC of compound (S)-9 ((S,S)-Whelk-O1, MeOH–H<sub>2</sub>O 85 : 15, 0.8 mL/min; detection at 280 nm):  $t_R$  17.3 min.

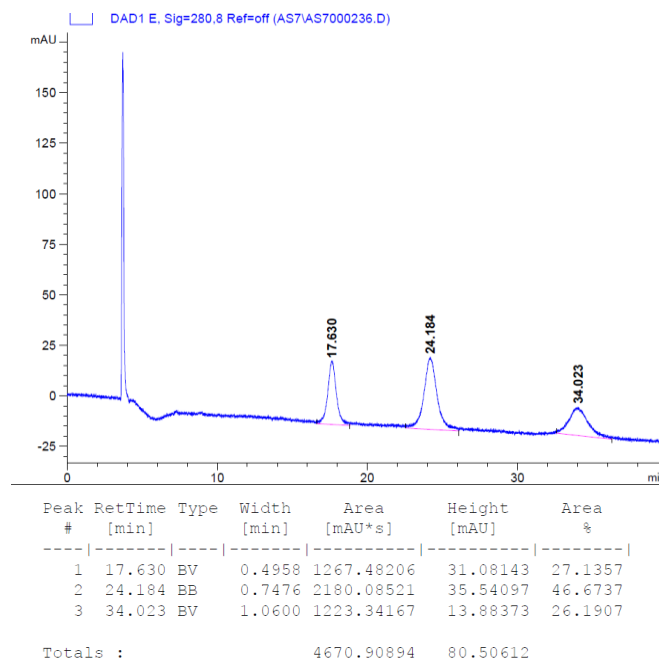

**Figure S20.** HPLC of mixture of diastereomers 9 ((S,S)-Whelk-O1, MeOH–H<sub>2</sub>O 85 : 15, 0.8 mL/min, detection at 280 nm):  $t_{S,S}$  17.6 min (27%),  $t_{R^*,S^*}$  24.2 min (47%),  $t_{R,R}$  34.0 min (26%).

## Cytotoxicity Assessment

**Table S1.** Cell lines and composition of culture medium

| Cell line                                          | Composition of complete culture medium                                                           |
|----------------------------------------------------|--------------------------------------------------------------------------------------------------|
| <b>CT-26</b> murine colon carcinoma                | RPMI-1640 supplemented with 100 × Glutamax, 100 × Penicillin-Streptomycin, 10% FBS, 0.1 M HEPES  |
| <b>4T1</b> murine mammary carcinoma                | DMEM/F12 (4.5 mg/L glucose, 25 mM HEPES), 100 × Glutamax, 100 × Penicillin-Streptomycin, 10% FBS |
| <b>MDA-MB-231</b> human breast adenocarcinoma      | DMEM/F12 (4.5 mg/L glucose, 25 mM HEPES), 100 × Glutamax, 100 × Penicillin-Streptomycin, 10% FBS |
| <b>COLO201</b> human colorectal adenocarcinoma     | RPMI-1640, 100 × Glutamax, 100 × Penicillin-Streptomycin, 10% FBS                                |
| <b>HepG2</b> human hepatocellular carcinoma        | DMEM/F12 (4.5 mg/L glucose, 25 mM HEPES), 100 × Glutamax, 100 × Penicillin-Streptomycin, 10% FBS |
| <b>A549</b> human non-small-cell lung carcinoma    | RPMI-1640 supplemented with 10% FBS, 2mM L-glutamine and 100 × Penicillin-Streptomycin           |
| <b>SK-BR-3</b> human breast adenocarcinoma         | RPMI-1640 supplemented with 10% FBS, 2mM L-glutamine and 100 × Penicillin-Streptomycin           |
| <b>SNU-1</b> human gastric carcinoma               | RPMI-1640 supplemented with 10% FBS, 2mM L-glutamine and 100 × Penicillin-Streptomycin           |
| <b>Jurkat</b> human acute T-lymphoblastic leukemia | RPMI-1640 supplemented with 10% FBS, 2mM L-glutamine and 100 × Penicillin-Streptomycin           |
| <b>WI-38</b> human lung fibroblasts                | RPMI-1640 supplemented with 10% FBS, 2mM L-glutamine and 100 × Penicillin-Streptomycin           |

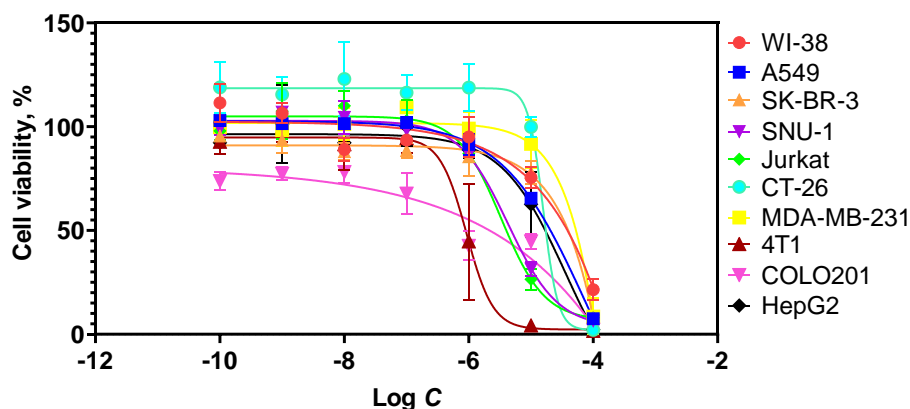

**Figure S21.** Viability of WI-38, A549, SK-BR-3, SNU-1, Jurkat, CT-26, MDA-MB-231, 4T1, COLO201, HepG2 cells vs. logarithmic concentration of compound **1c** after a 72-h incubation.

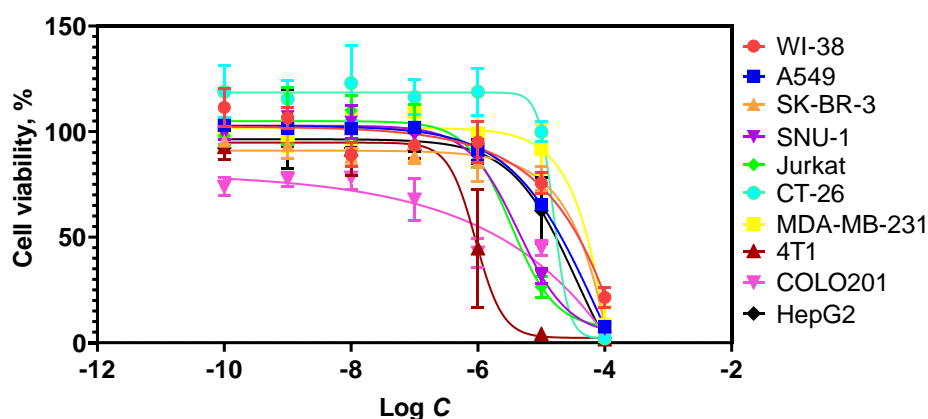

**Figure S22.** Viability of WI-38, A549, SK-BR-3, SNU-1, Jurkat, CT-26, MDA-MB-231, 4T1, COLO201, HepG2 cells vs. logarithmic concentration of compound **1d** after a 72-h incubation.

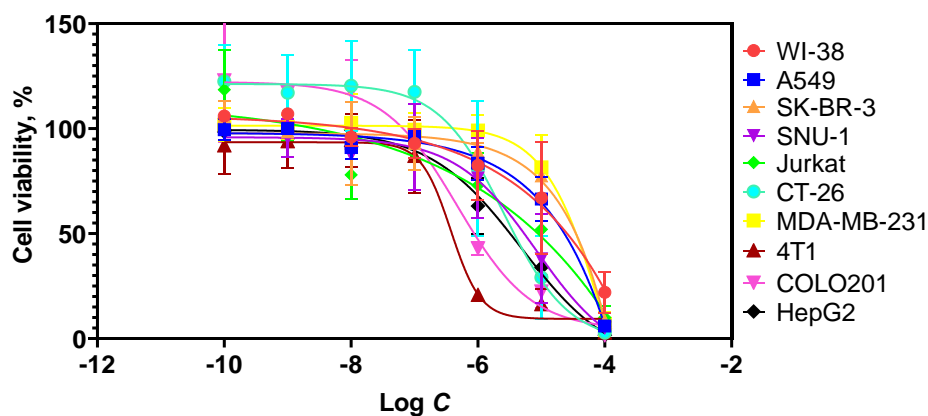

**Figure S23.** Viability of WI-38, A549, SK-BR-3, SNU-1, Jurkat, CT-26, MDA-MB-231, 4T1, COLO201, HepG2 cells vs. logarithmic concentration of compound **1e** after a 72-h incubation.

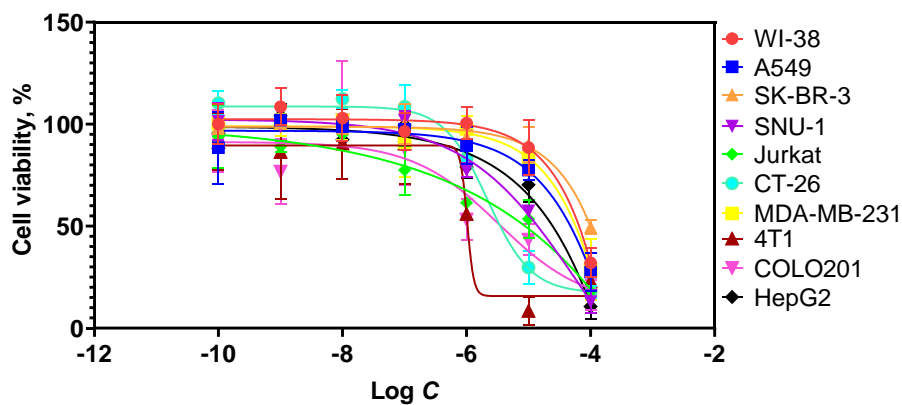

**Figure S24.** Viability of WI-38, A549, SK-BR-3, SNU-1, Jurkat, CT-26, MDA-MB-231, 4T1, COLO201, HepG2 cells vs. logarithmic concentration of compound **1f** after a 72-h incubation.

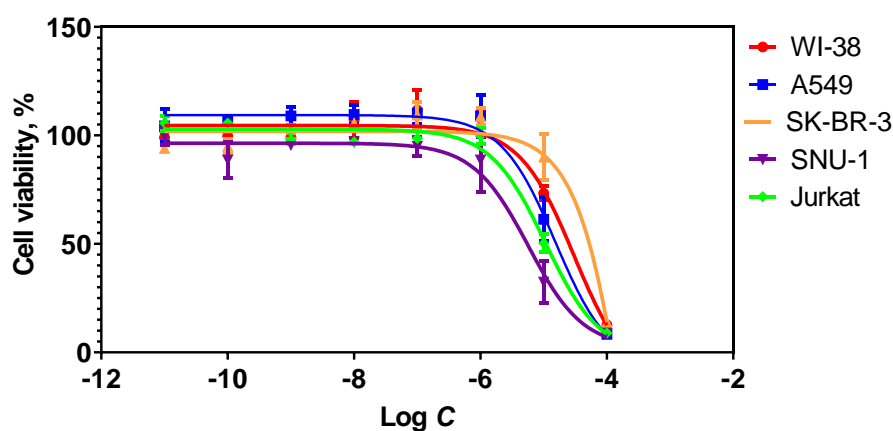

**Figure S25.** Viability of WI-38, A549, SK-BR-3, SNU-1, and Jurkat cells vs. logarithmic concentration of compound **6** after a 72-h incubation.

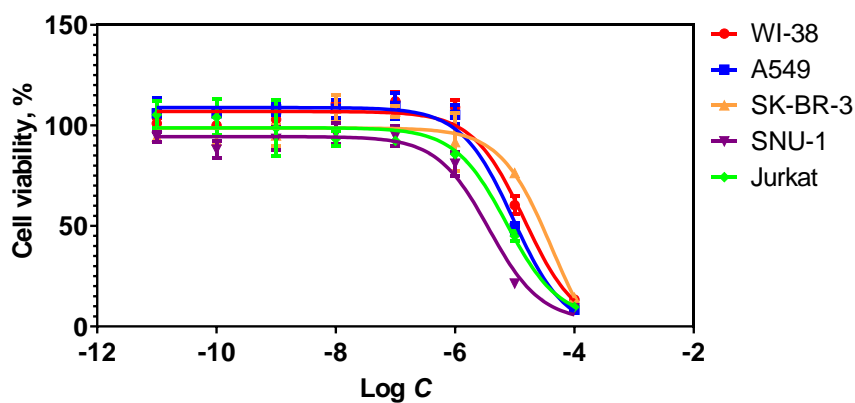

**Figure S26.** Viability of WI-38, A549, SK-BR-3, SNU-1, and Jurkat cells vs. logarithmic concentration of compound **7** after a 72-h incubation.

## Cell Cycle Analysis

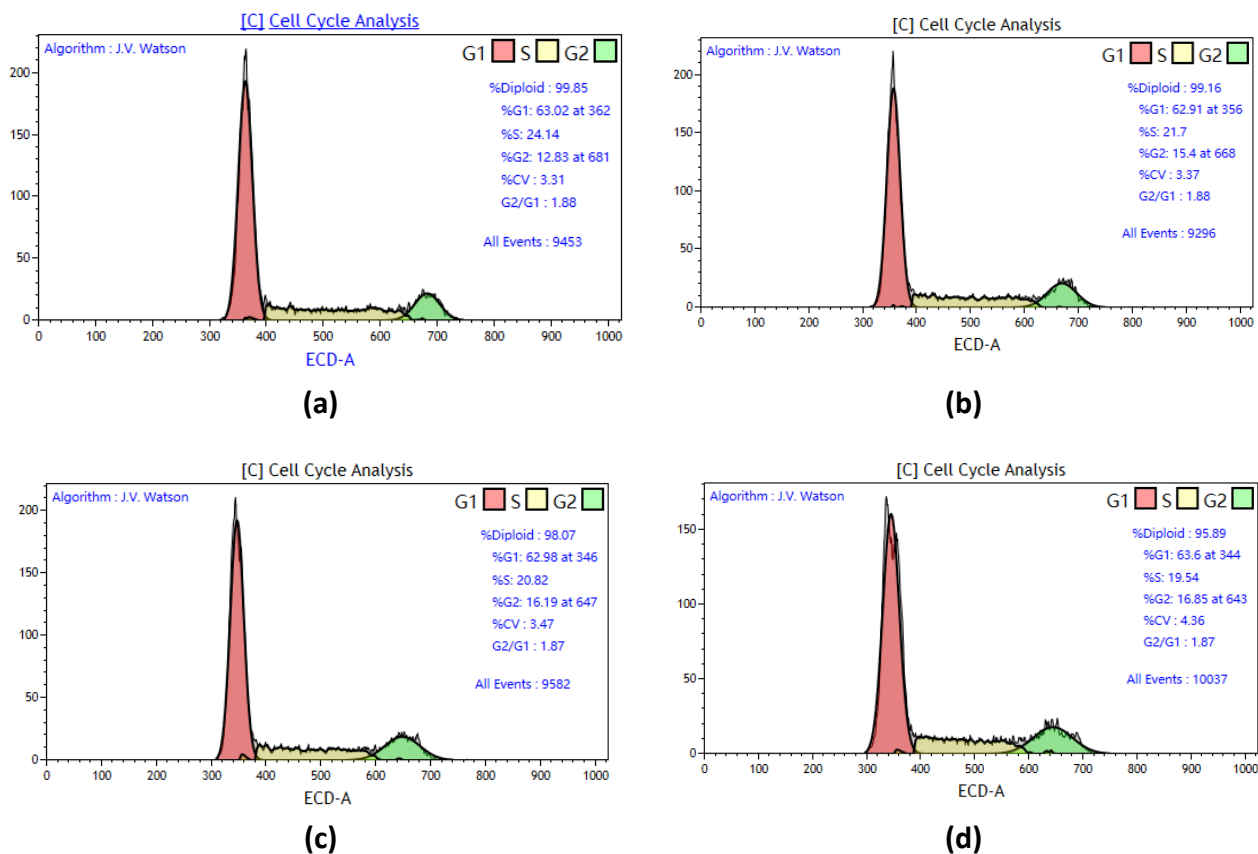

**Figure S27.** Diagrams of the COLO201 cell distribution by cell cycle phases: (a) without the addition of the test compound (control) and after 24-h incubation with compound **1d** at concentrations of (b)  $0.9 \times 10^{-6}$  M, (c)  $1 \times 10^{-6}$  M, and (d)  $2 \times 10^{-6}$  M.

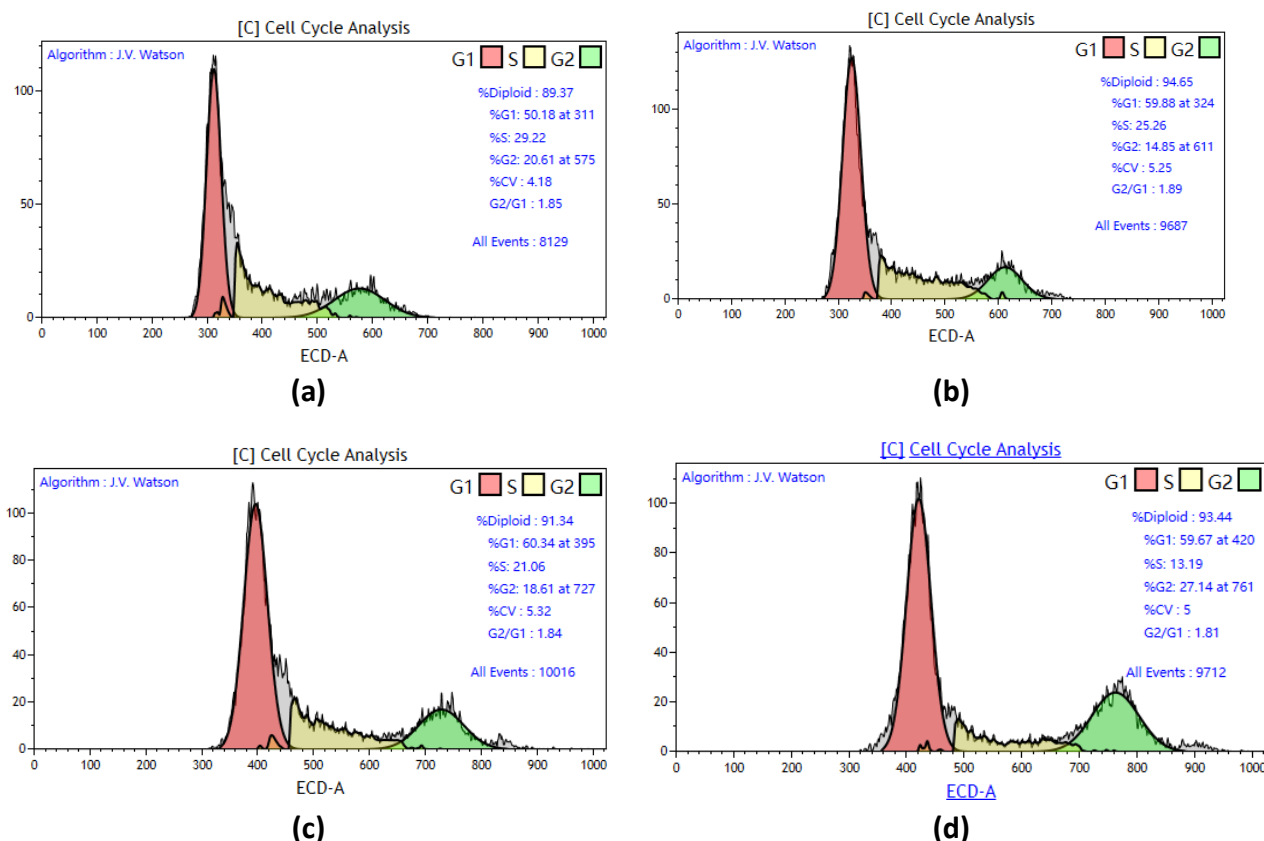

**Figure S28.** Diagrams of the MDA-MB-231 cell distribution by cell cycle phases: (a) without the addition of the test compound (control) and after 24-h incubation with compound **1d** at concentrations of (b)  $10 \times 10^{-6}$  M, (c)  $20 \times 10^{-6}$  M, and (d)  $30 \times 10^{-6}$  M.

**Table S2.** Effect of compound **1d** on the cell cycle of the COLO201 cells. Data are presented as  $M \pm SD$  ( $n = 3$ ).

| Concentration (M)    | Number of cells (%) in cell cycle phase |                   |                   | Cell proliferation index (%) |
|----------------------|-----------------------------------------|-------------------|-------------------|------------------------------|
|                      | G0/G1                                   | S                 | G2M               |                              |
| 0                    | 63.38 $\pm$ 2.16                        | 24.64 $\pm$ 1.24  | 11.98 $\pm$ 1.23  | 36.62 $\pm$ 2.16             |
| $0.9 \times 10^{-6}$ | 62.95 $\pm$ 0.21                        | 21.35 $\pm$ 0.34* | 15.70 $\pm$ 0.45* | 37.05 $\pm$ 0.21             |
| $1 \times 10^{-6}$   | 63.21 $\pm$ 0.29                        | 21.38 $\pm$ 0.70* | 15.41 $\pm$ 0.74* | 36.78 $\pm$ 0.29             |
| $2 \times 10^{-6}$   | 64.60 $\pm$ 0.97                        | 18.51 $\pm$ 0.99* | 16.84 $\pm$ 0.08* | 35.35 $\pm$ 0.96             |

\*  $p < 0.05$  compared to control.

**Table S3.** Effect of compound **1d** on the cell cycle of the MDA-MB-231 cells. Data are presented as  $M \pm SD$  ( $n = 3$ ).

| Concentration (M)   | Number of cells (%) in cell cycle phase |                   |                   | Cell proliferation index (%) |
|---------------------|-----------------------------------------|-------------------|-------------------|------------------------------|
|                     | G0/G1                                   | S                 | G2M               |                              |
| 0                   | 48.01 $\pm$ 1.94                        | 31.22 $\pm$ 1.81  | 20.78 $\pm$ 1.00  | 52.00 $\pm$ 1.94             |
| $10 \times 10^{-6}$ | 60.92 $\pm$ 0.91*                       | 25.33 $\pm$ 0.42* | 13.74 $\pm$ 1.13* | 39.08 $\pm$ 0.91*            |
| $20 \times 10^{-6}$ | 62.13 $\pm$ 1.98*                       | 20.52 $\pm$ 0.81* | 17.05 $\pm$ 1.36* | 37.57 $\pm$ 1.98*            |
| $30 \times 10^{-6}$ | 59.37 $\pm$ 1.02*                       | 13.13 $\pm$ 0.21* | 27.49 $\pm$ 1.22* | 40.63 $\pm$ 1.01*            |

\*  $p < 0.05$  compared to control.
